# Supplementary material
Source: Elsevier journal article supplement (https://www.sciencedirect.com/science/article/pii/S0021755717311440)
Supplement: mmc1 [file S0021755717311440:mmc1.docx]

S1. Figure 1. Flowchart of eligible population and sampling (Jujuy, 2009-2014).

S2. Figure 2. Prevalence of underweight by geographic altitude and gestational

age (Jujuy, 2009-2014).

LA, Low altitudinal level; HA, High altitudinal level.

S3 Figure 3. Prevalence of stunting by geographic altitude and gestational age

(Jujuy, 2009-2014).

LA, Low altitudinal level; HA, High altitudinal level.

S4 Figure 4. Prevalence of wasting by geographic altitude and gestational age

(Jujuy, 2009-2014).

LA, Low altitudinal level; HA, High altitudinal level.

S5 Table 1. Crude and adjusted risks of underweight, stunting, and wasting associated with high altitude (Jujuy, 2009-2014).

| PHENOTYPE | CRUDE OR (95% CI) | ADJUSTED OR  (95% CI)a | *p*b |
| --- | --- | --- | --- |
| Underweight | 1.92 (1.63-2.27) | 2.27 (1.76-2.92) | < 0.001 |
| Stunting | 2.21 (1.99-2.45) | 1.82 (1.56-2.13) | < 0.001 |
| Wasting | 2.39 (2.18-2.62) | 2.77 (2.45-3.12) | < 0.001 |

a Adjusted by logistic regression (see covariate in the text).

b For logistic regression.
